# Supplementary material
Source: PubMed Central journal article supplement (PMC9673159)
Supplement: NIHMS1826416-supplement-Supplemental_Publication_Material.pdf [file NIHMS1826416-supplement-Supplemental_Publication_Material.pdf]

Supplemental Table 1. Predictors of ARNI Prescription at Hospital Discharge Stratified by Early vs Late

| Early (2017-2018)                                                   |            |                          |       |        |         | Late (2019-2020) |                          |       |        |         |
|---------------------------------------------------------------------|------------|--------------------------|-------|--------|---------|------------------|--------------------------|-------|--------|---------|
|                                                                     | Odds Ratio | 95% Confidence Intervals |       | Lambda | p-value | Odds Ratio       | 95% Confidence Intervals |       | Lambda | p-value |
|                                                                     |            | Lower                    | Upper |        |         |                  | Lower                    | Upper |        |         |
| Intercept                                                           | 0.076      | 0.050                    | 0.115 | 0.344  | <0.001  | 0.245            | 0.167                    | 0.358 | 0.265  | <0.001  |
| Age*                                                                | 0.988      | 0.984                    | 0.992 | 0.248  | <0.001  | 0.988            | 0.984                    | 0.992 | 0.233  | <0.001  |
| Sex (Comparison Group: Male)                                        |            |                          |       |        |         |                  |                          |       |        |         |
| Female                                                              | 0.972      | 0.883                    | 1.071 | 0.166  | 0.568   | 0.979            | 0.888                    | 1.078 | 0.148  | 0.663   |
| Race (Comparison Group: Caucasian)                                  |            |                          |       |        |         |                  |                          |       |        |         |
| Asian                                                               | 1.035      | 0.705                    | 1.528 | 0.211  | 0.861   | 1.505            | 1.100                    | 2.059 | 0.131  | 0.011   |
| Black                                                               | 1.124      | 0.983                    | 1.284 | 0.266  | 0.087   | 1.123            | 0.982                    | 1.283 | 0.227  | 0.090   |
| Hispanic                                                            | 1.223      | 1.006                    | 1.486 | 0.196  | 0.044   | 1.396            | 1.142                    | 1.707 | 0.178  | 0.001   |
| Other                                                               | 0.949      | 0.719                    | 1.251 | 0.186  | 0.710   | 0.934            | 0.712                    | 1.224 | 0.117  | 0.619   |
| Distress Score Quintile (Comparison Group: Prosperous)              |            |                          |       |        |         |                  |                          |       |        |         |
| Comfortable                                                         | 1.018      | 0.844                    | 1.228 | 0.462  | 0.852   | 0.901            | 0.747                    | 1.084 | 0.439  | 0.278   |
| Mid-Tier                                                            | 0.924      | 0.776                    | 1.101 | 0.367  | 0.379   | 0.887            | 0.742                    | 1.060 | 0.357  | 0.187   |
| At-Risk                                                             | 0.905      | 0.747                    | 1.100 | 0.451  | 0.318   | 0.851            | 0.708                    | 1.023 | 0.371  | 0.087   |
| Distressed                                                          | 0.860      | 0.698                    | 1.059 | 0.471  | 0.157   | 0.763            | 0.624                    | 0.933 | 0.403  | 0.009   |
| Zip Designation (Comparison Group: Urban)                           |            |                          |       |        |         |                  |                          |       |        |         |
| Rural                                                               | 1.105      | 0.903                    | 1.352 | 0.458  | 0.334   | 1.115            | 0.910                    | 1.365 | 0.424  | 0.294   |
| Small town                                                          | 1.042      | 0.858                    | 1.265 | 0.417  | 0.678   | 1.043            | 0.856                    | 1.270 | 0.400  | 0.680   |
| Suburban                                                            | 1.041      | 0.894                    | 1.212 | 0.431  | 0.607   | 1.052            | 0.907                    | 1.220 | 0.366  | 0.501   |
| Insurance (Comparison Group: Other Non-Medicare/Medicaid Insurance) |            |                          |       |        |         |                  |                          |       |        |         |
| Medicaid                                                            | 0.824      | 0.718                    | 0.944 | 0.112  | 0.005   | 0.797            | 0.684                    | 0.927 | 0.244  | 0.003   |
| Medicare                                                            | 0.949      | 0.840                    | 1.072 | 0.258  | 0.399   | 0.983            | 0.870                    | 1.112 | 0.216  | 0.788   |
| None                                                                | 0.684      | 0.526                    | 0.889 | 0.374  | 0.005   | 0.505            | 0.393                    | 0.647 | 0.250  | <0.001  |

|                                                              |        |        |        |       |        |        |        |        |       |        |
|--------------------------------------------------------------|--------|--------|--------|-------|--------|--------|--------|--------|-------|--------|
| Ejection fraction**                                          | 0.925  | 0.920  | 0.931  | 0.248 | <0.001 | 0.945  | 0.940  | 0.951  | 0.203 | <0.001 |
| Discharge Serum Creatinine*                                  | 0.723  | 0.648  | 0.806  | 0.693 | <0.001 | 0.765  | 0.698  | 0.850  | 0.643 | <0.001 |
| Discharge Serum Potassium (Comparison Group: K≤5)            |        |        |        |       |        |        |        |        |       |        |
| K>5                                                          | 0.853  | 0.597  | 1.219  | 0.494 | 0.384  | 0.925  | 0.652  | 1.313  | 0.489 | 0.664  |
| Discharge Systolic Blood Pressure (Comparison Group: sBP≥90) |        |        |        |       |        |        |        |        |       |        |
| sBP<90                                                       | 0.876  | 0.605  | 1.269  | 0.398 | 0.485  | 0.718  | 0.498  | 1.035  | 0.313 | 0.076  |
| Discharge Heart Rate (Comparison Group: HR≥60)               |        |        |        |       |        |        |        |        |       |        |
| HR<60                                                        | 1.116  | 0.885  | 1.408  | 0.427 | 0.355  | 1.053  | 0.844  | 1.315  | 0.325 | 0.646  |
| No Prior Medical History (Comparison Group: No)              |        |        |        |       |        |        |        |        |       |        |
| Yes                                                          | 0.935  | 0.677  | 1.292  | 0.183 | 0.685  | 0.801  | 0.592  | 1.082  | 0.114 | 0.148  |
| History of Congestive Heart Failure (Comparison Group: No)   |        |        |        |       |        |        |        |        |       |        |
| Yes                                                          | 0.998  | 0.886  | 1.123  | 0.211 | 0.969  | 0.905  | 0.796  | 1.029  | 0.321 | 0.127  |
| History of Chronic Kidney Disease (Comparison Group: No)     |        |        |        |       |        |        |        |        |       |        |
| Yes                                                          | 0.828  | 0.699  | 0.982  | 0.432 | 0.031  | 0.787  | 0.667  | 0.929  | 0.413 | 0.005  |
| History of End Stage Renal Disease (Comparison Group: No)    |        |        |        |       |        |        |        |        |       |        |
| Yes                                                          | 1.551  | 1.029  | 2.336  | 0.303 | 0.036  | 1.361  | 0.899  | 2.062  | 0.359 | 0.146  |
| Listed for Heart Transplant (Comparison Group: No)           |        |        |        |       |        |        |        |        |       |        |
| Yes                                                          | 0.489  | 0.091  | 2.623  | 0.021 | 0.404  | 0.456  | 0.104  | 1.988  | 0.069 | 0.296  |
| Taking ARNI Prior to Hospitalization (Comparison Group: No)  |        |        |        |       |        |        |        |        |       |        |
| Yes                                                          | 12.577 | 8.517  | 18.572 | 0.813 | <0.001 | 7.460  | 5.260  | 10.579 | 0.771 | <0.001 |
| Contraindication to ACEi/ARB/ARNI (Comparison Group: No)     |        |        |        |       |        |        |        |        |       |        |
| Yes                                                          | 0.132  | 0.117  | 0.149  | 0.296 | <0.001 | 0.085  | 0.076  | 0.096  | 0.235 | <0.001 |
| Received inpatient ARNI (Comparison Group: No)               |        |        |        |       |        |        |        |        |       |        |
| Yes                                                          | 81.983 | 63.016 | 106.66 | 0.783 | <0.001 | 73.981 | 59.811 | 91.508 | 0.677 | <0.001 |

|                                                          |       |       |       |       |        |       |       |       |       |        |
|----------------------------------------------------------|-------|-------|-------|-------|--------|-------|-------|-------|-------|--------|
| Received any inpatient inotrope (Comparison Group: No)   |       |       |       |       |        |       |       |       |       |        |
| Yes                                                      | 0.504 | 0.381 | 0.665 | 0.085 | <0.001 | 0.575 | 0.443 | 0.746 | 0.071 | <0.001 |
| Discharged with GDMT BB (Comparison Group: No)           |       |       |       |       |        |       |       |       |       |        |
| Yes                                                      | 1.946 | 1.670 | 2.268 | 0.231 | <0.001 | 1.730 | 1.497 | 1.998 | 0.167 | <0.001 |
| Discharged with ACEi or ARB (Comparison Group: No)       |       |       |       |       |        |       |       |       |       |        |
| Yes                                                      | 0.090 | 0.078 | 0.103 | 0.468 | <0.001 | 0.101 | 0.089 | 0.115 | 0.341 | <0.001 |
| Discharged with MRA (Comparison Group: No)               |       |       |       |       |        |       |       |       |       |        |
| Yes                                                      | 1.661 | 1.483 | 1.861 | 0.384 | <0.001 | 1.922 | 1.731 | 2.134 | 0.233 | <0.001 |
| Scheduled Follow Up on Discharge (Comparison Group: No)  |       |       |       |       |        |       |       |       |       |        |
| Yes                                                      | 1.307 | 1.025 | 1.667 | 0.235 | 0.031  | 1.019 | 0.827 | 1.256 | 0.245 | 0.857  |
| Discharged to Continued Care (Comparison Group: No)      |       |       |       |       |        |       |       |       |       |        |
| Yes                                                      | 0.766 | 0.674 | 0.870 | 0.496 | <0.001 | 0.772 | 0.684 | 0.871 | 0.409 | <0.001 |
| Year of Discharge (Comparison Group: Discharged in 2017) |       |       |       |       |        |       |       |       |       |        |
| 2018                                                     | 1.356 | 1.236 | 1.487 | 0.140 | <0.001 |       |       |       |       |        |
| Year of Discharge (Comparison Group: Discharged in 2019) |       |       |       |       |        |       |       |       |       |        |
| 2020                                                     |       |       |       |       |        | 1.134 | 1.023 | 1.258 | 0.131 | 0.017  |
| Heart Transplant Center (Comparison Group: No)           |       |       |       |       |        |       |       |       |       |        |
| Yes                                                      | 0.584 | 0.347 | 0.981 | 0.030 | 0.042  | 0.518 | 0.295 | 0.911 | 0.021 | 0.022  |
| Academic Center (Comparison Group: No)                   |       |       |       |       |        |       |       |       |       |        |
| Yes                                                      | 1.121 | 0.866 | 1.450 | 0.069 | 0.386  | 1.281 | 0.972 | 1.690 | 0.047 | 0.079  |

Data were stratified by year of discharge with “early” being defined as discharged in 2017 or 2018 and “late” being defined as discharged in 2019 or 2020. Coefficients and 95% confidence intervals are presented as odds ratios. Unless otherwise indicated by an asterisk, odds ratios are relative to the defined comparison group. Variables denoted by a single asterisk (\*) are continuous variables and indicate a change in the odds ratio per 1-unit change in the continuous variable, with the exception of (\*\*) ejection fraction, where the estimate indicates the change in odds ratio per 5% change in ejection fraction. Lambda indicates the proportion of variation due to missing data. All continuous variables have been grand mean centered, so the intercept can be interpreted as the odds of being prescribed an ARNI with all categorical variables assuming their baseline comparison group value and all continuous variables at their mean value. A history of chronic kidney disease is defined by the GWTC data dictionary as a serum creatinine >2mg/dL. Academic centers were defined by the presence of resident post-graduate physicians. For the variable "Discharged to Continued Care", continued care is defined as home health care, skilled nursing facility, inpatient rehabilitation, intermediate care facility, long term acute care facility, or another acute care facility.
